# Supplementary material for: The Flavonoid Rich Black Currant (Ribes nigrum) Ethanolic Gemmotherapy Extract Elicits Neuroprotective Effect by Preventing Microglial Body Swelling in Hippocampus and Reduces Serum TNF-α Level: Pilot Study
Source: MDPI journal article supplement (doi:10.3390/molecules28083571), 2023-04-19
Supplement: s1 [file s1]

**Supplementary Table S1.** Solvent gradient

| <b>Time, min</b> | <b>% Acetonitrile</b> | <b>% Water</b> | <b>% of 0.1 % formic acid</b> |
|------------------|-----------------------|----------------|-------------------------------|
| 0                | 10                    | 80             | 10                            |
| 5                | 30                    | 60             | 10                            |
| 10               | 50                    | 40             | 10                            |
| 15               | 70                    | 20             | 10                            |
| 20               | 80                    | 10             | 10                            |
| 25               | 70                    | 20             | 10                            |
| 35               | 30                    | 60             | 10                            |
| 40               | 10                    | 80             | 10                            |
